# Supplementary material
Source: PubMed Central journal article supplement (PMC5447456)
Supplement: NIHMS6670-supplement-Supplementary_Materials.pdf [file NIHMS6670-supplement-Supplementary_Materials.pdf]

## **SUPPLEMENTARY MATERIALS**

### **Type I Interferon Responses Drive Intrahepatic T cells to Promote Metabolic Syndrome**

Magar Ghazarian, Xavier S. Revelo, Mark K. Nøhr, Helen Luck, Kejing Zeng, Helena Lei, Sue Tsai, Stephanie A. Schroer, Yoo J. Park, Melissa Hui Yng Chng, Lei Shen, June Ann D'Angelo, Peter Horton, William C. Chapman, Diane Brockmeier, Minna Woo, Edgar G. Engleman, Oyedele Adeyi, Naoto Hirano, Tianru Jin, Adam J. Gehring, Shawn Winer & Daniel A. Winer

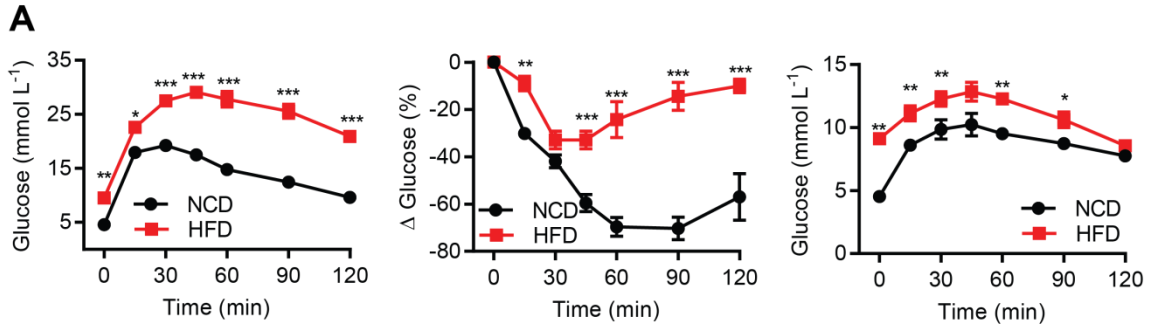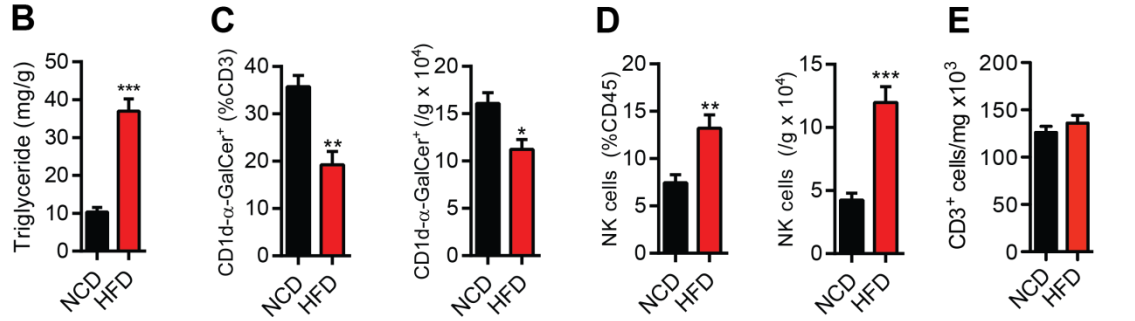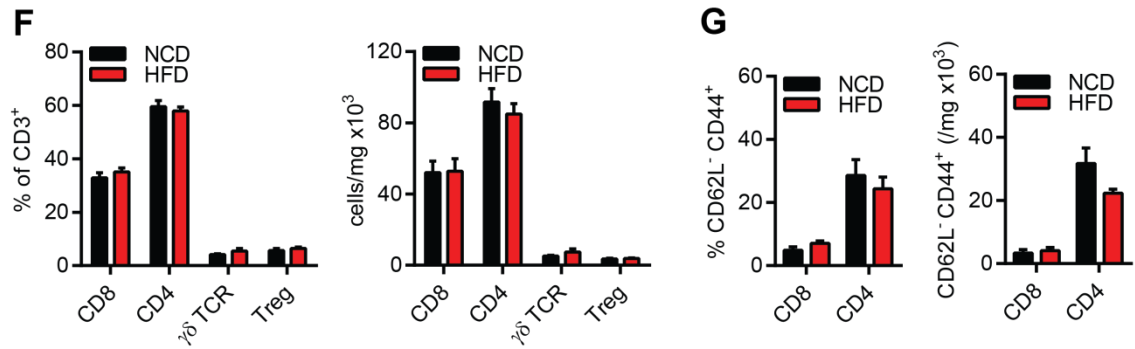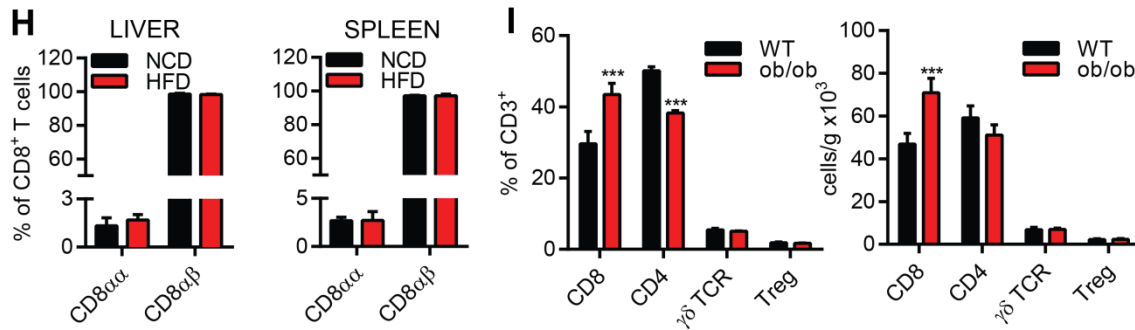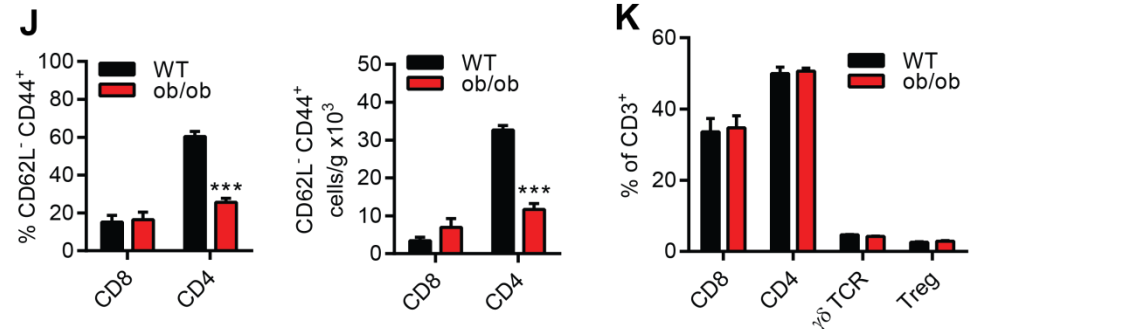

**Supplemental Figure 1. Metabolic parameters and hepatic T cell subsets of HFD-fed and ob/ob mice.** Metabolic testing of wildtype (WT) mice fed either a NCD or HFD for 16 weeks including **(A)** a glucose tolerance test (GTT; Left, n=5), insulin tolerance test (ITT; Center, n=5), pyruvate tolerance test (PTT; Right, n=5), and **(B)** liver triglyceride content. Flow cytometry analysis of livers from 16 wk HFD- or NCD-fed WT mice showing **(C)** the frequency and number of CD1d-restricted invariant NKT cells, as indicated by  $\alpha$ GC-loaded CD1d tetramer staining (n=5) and **(D)** the frequency and number of CD45+CD3-NK1.1+ gated NK cells (n=8). Flow cytometry analysis of splenocytes isolated from 16 wk HFD- or NCD-fed WT mice showing the **(E)** total number of splenic T cells (n=4), **(F)** frequency (Left) and total number (Right) of CD8+, CD4+,  $\gamma\delta$ TCR+, or CD4+Foxp3+ (Treg) gated splenic T cell subsets (n=4-7), and **(G)** CD8+ or CD4+ CD62L- CD44+ gated effector memory T cell subsets (n=3). Flow cytometry analysis of **(H)** hepatic (left) or splenic (right) CD8 $\alpha\alpha$ + or CD8 $\alpha\beta$ + cells (n=3). Flow cytometry analysis of 12 week-old ob/ob and WT mice showing the **(I)** frequency and number of CD45+CD3+NK1.1- gated hepatic T cell subsets (n=4-8), **(J)** CD8+ or CD4+ CD62L- CD44+ hepatic effector memory T cell subsets (n = 4), and the **(K)** frequency of splenic T cell subsets (n=3-7). Statistical significance is denoted by \*(p<0.05), \*\*(p<0.01), and \*\*\*(p<0.001).

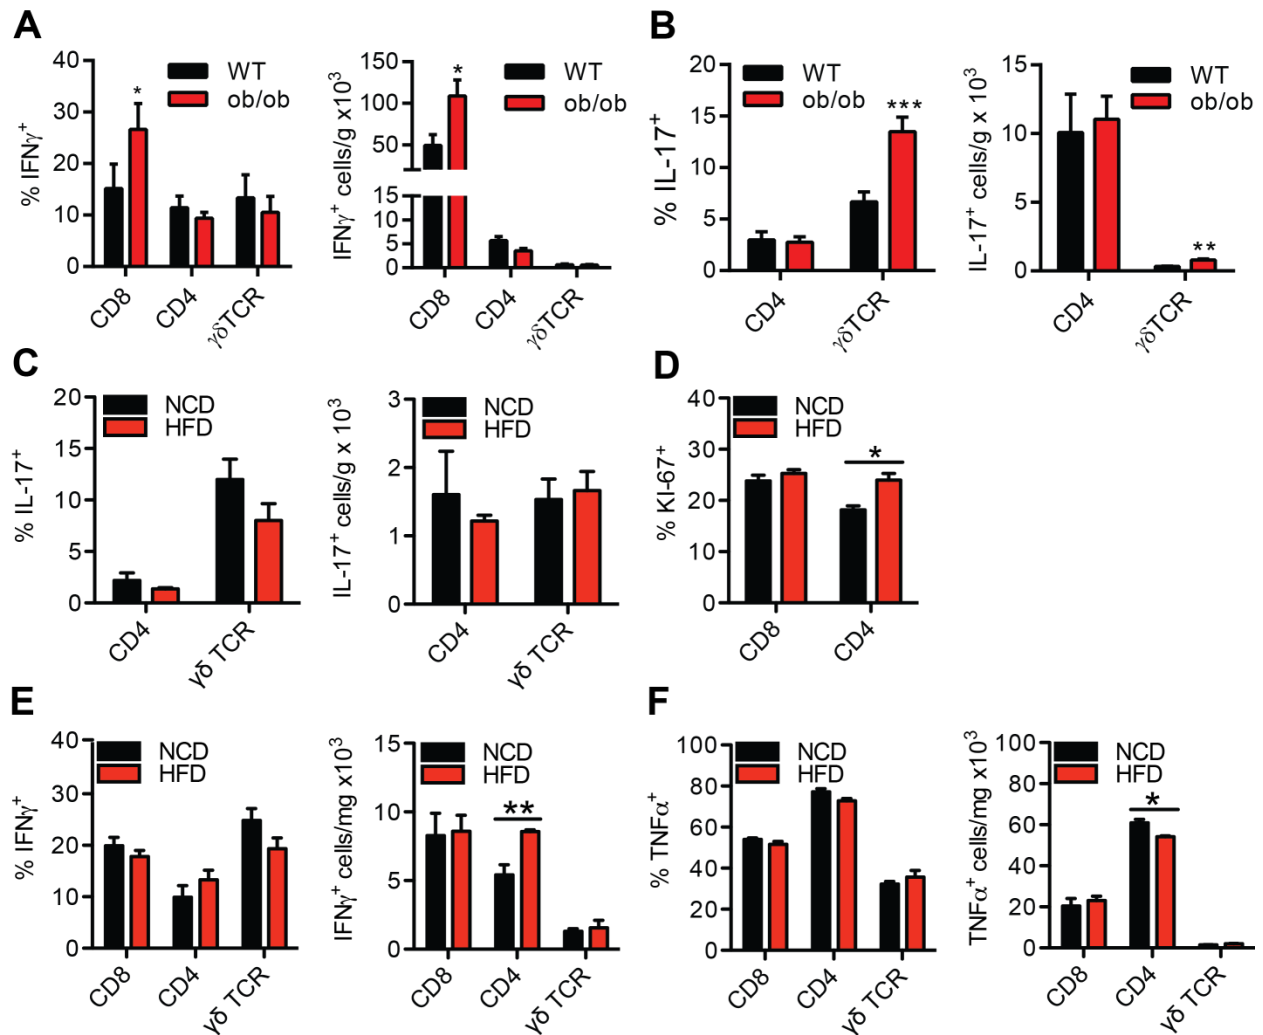

**Supplemental Figure 2. Cytokine production by T cell subsets in the livers of ob/ob mice and WT HFD-fed mice, as well as spleens of 16 week HFD-fed mice.** Intracellular stain for **(A)** IFN $\gamma$ <sup>+</sup> T cell subsets, **(B)** IL-17A<sup>+</sup> CD4 and  $\gamma\delta$ TCR T cells in the livers of 12-week old WT and ob/ob mice (n=4) and **(C)** IL-17A<sup>+</sup> CD4 and  $\gamma\delta$ TCR T cells in the livers of 16 week NCD- and HFD-fed WT mice (n=9). Intracellular stain for **(D)** KI-67<sup>+</sup> (n = 3), **(E)** IFN $\gamma$ <sup>+</sup> (n=4), and **(F)** TNF $\alpha$ <sup>+</sup> (n=3) in CD8<sup>+</sup>, CD4<sup>+</sup> or  $\gamma\delta$ TCR<sup>+</sup> gated T cells in the spleen of NCD- or HFD-fed mice. Statistical significance is denoted by \* (p<0.05), and \*\* (p<0.01).

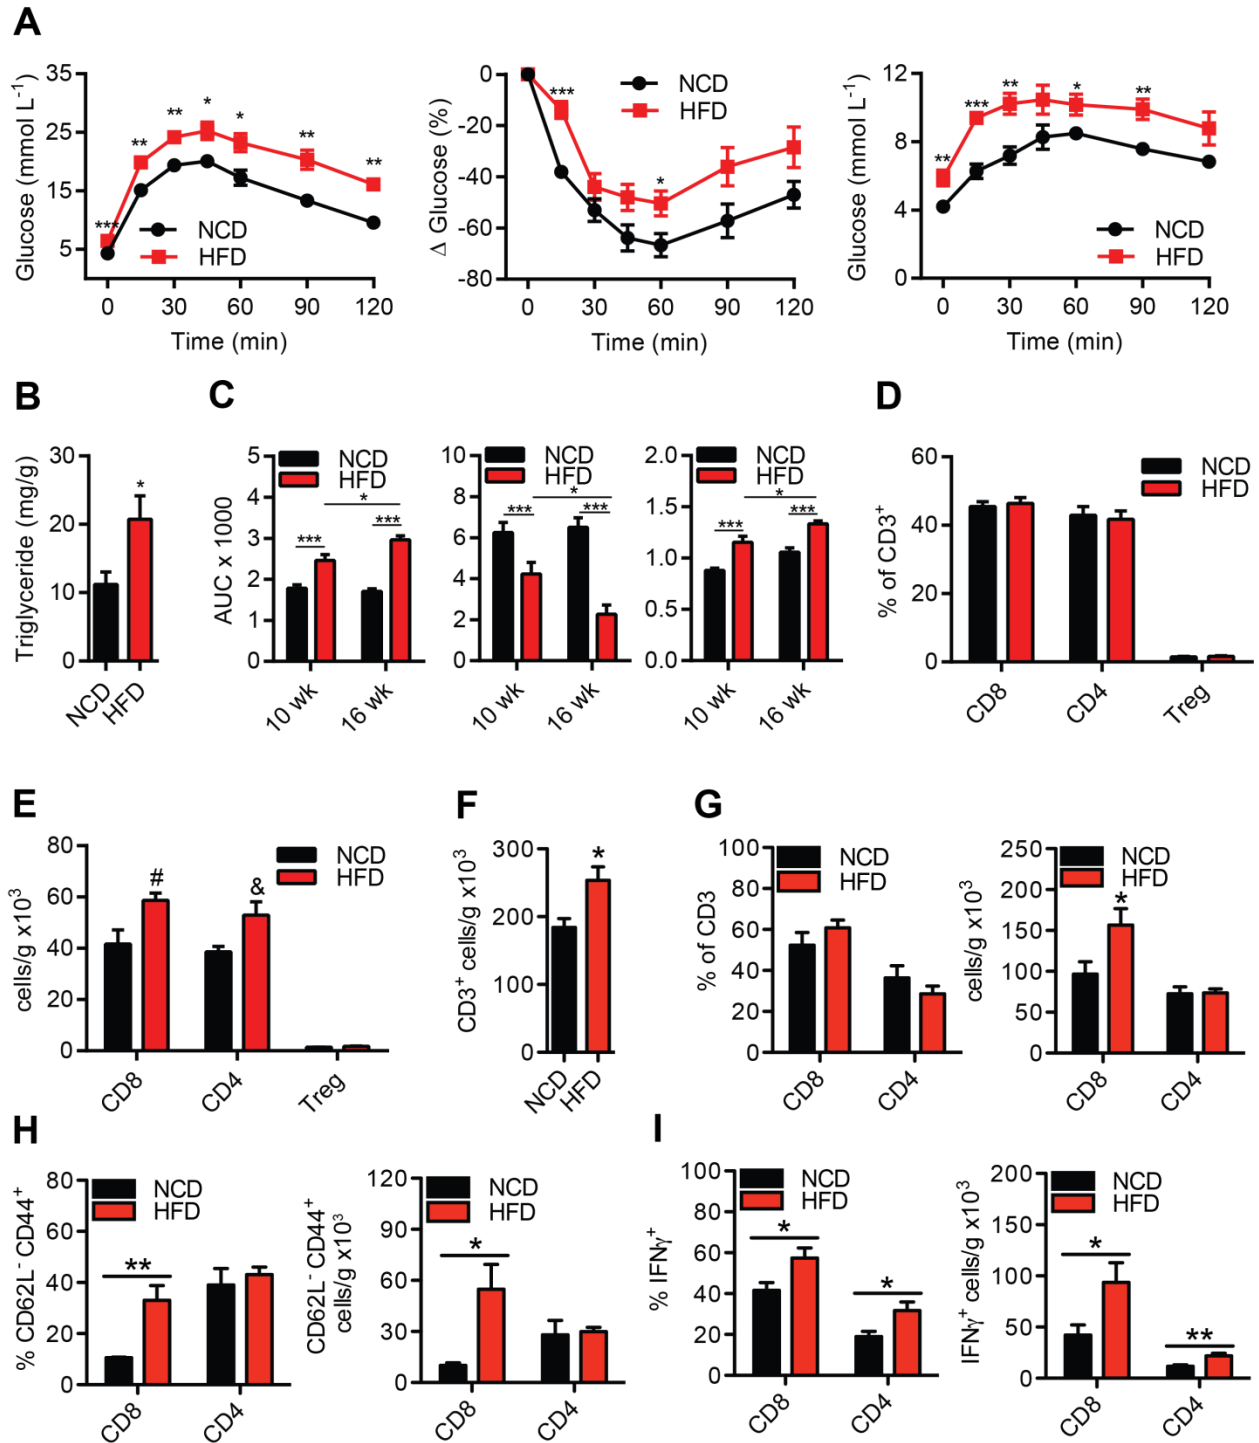

**Supplemental Figure 3. Metabolic parameters and/or hepatic T cell populations of wildtype mice fed HFD for shorter (10 weeks) or longer (32 weeks) duration.** Metabolic testing of mice fed either a NCD or HFD for 10 weeks including a (A) glucose tolerance test (GTT; Left, n=5), insulin tolerance test (ITT; Center, n=5), pyruvate

tolerance test (PTT; Right, n=5), and **(B)** liver triglyceride content. **(C)** Calculated areas under the curves (AUC) for the GTT (Left), ITT (Center), and PTT (Right) of mice fed either a NCD or HFD for 10 and 16 weeks (n=5). Flow cytometry analysis of liver immune cells isolated from 10 wk HFD- or NCD-fed WT mice representing the **(D)** frequency and **(E)** total number of hepatic T cells subset (n=3; #p=0.051, &p=0.064). Flow cytometry analysis of liver immune cells isolated from 32 wk HFD- or NCD-fed WT mice representing **(F)** total number of hepatic CD45+CD3+NK1.1- gated T cells per gram of tissue (n=5), **(G)** CD8+ or CD4+ gated hepatic T cell subsets (n=5), **(H)** CD8+ or CD4+ CD62L- CD44+ gated effector memory T cell subsets (n=5), and **(I)** intracellular T cell stains for IFN $\gamma$  (n=5) in CD8+ or CD4+ gated T cells. Statistical significance is denoted by \* (p<0.05), and \*\* (p<0.01).

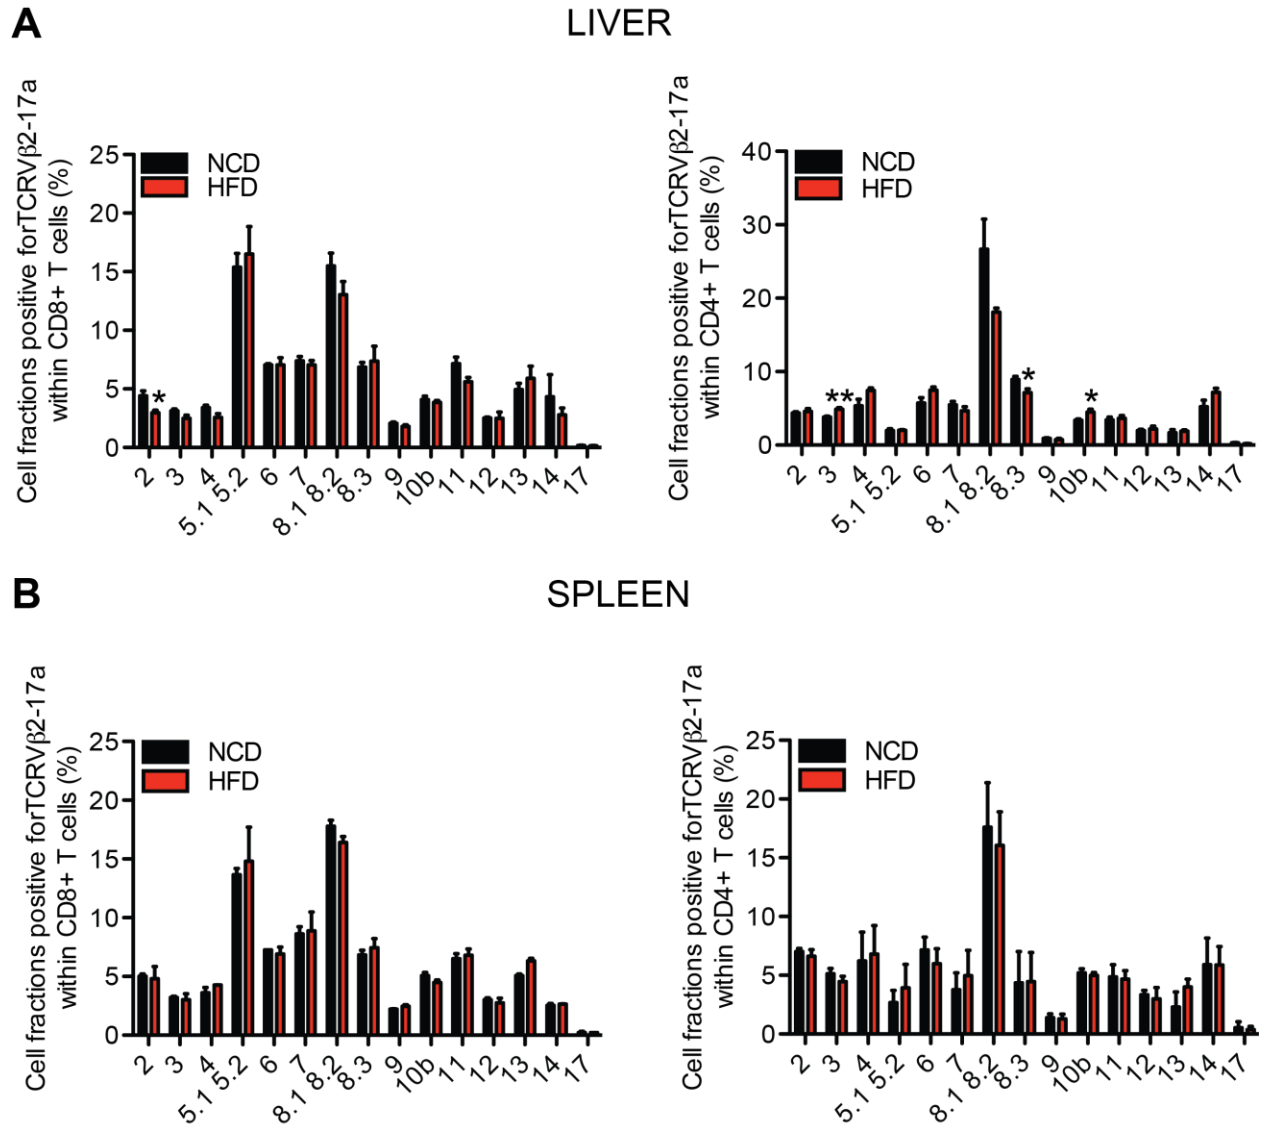

**Supplemental Figure 4. Surface TCR $\nu\beta$  expression in hepatic and splenic T cells in HFD- or NCD-fed mice.** Flow cytometry analysis of surface TCR $\nu\beta$ 2-17a expression in 16 wk HFD- or NCD-fed WT mice representing **(A)** hepatic (n=4, 2 mice pooled per sample), and **(B)** splenic (n=2, 2 mice pooled per sample) CD45+CD3+NK1.1- CD8+ or CD4+ gated T cells. Statistical significance is denoted by \* (p<0.05), and \*\* (p<0.01).

**A**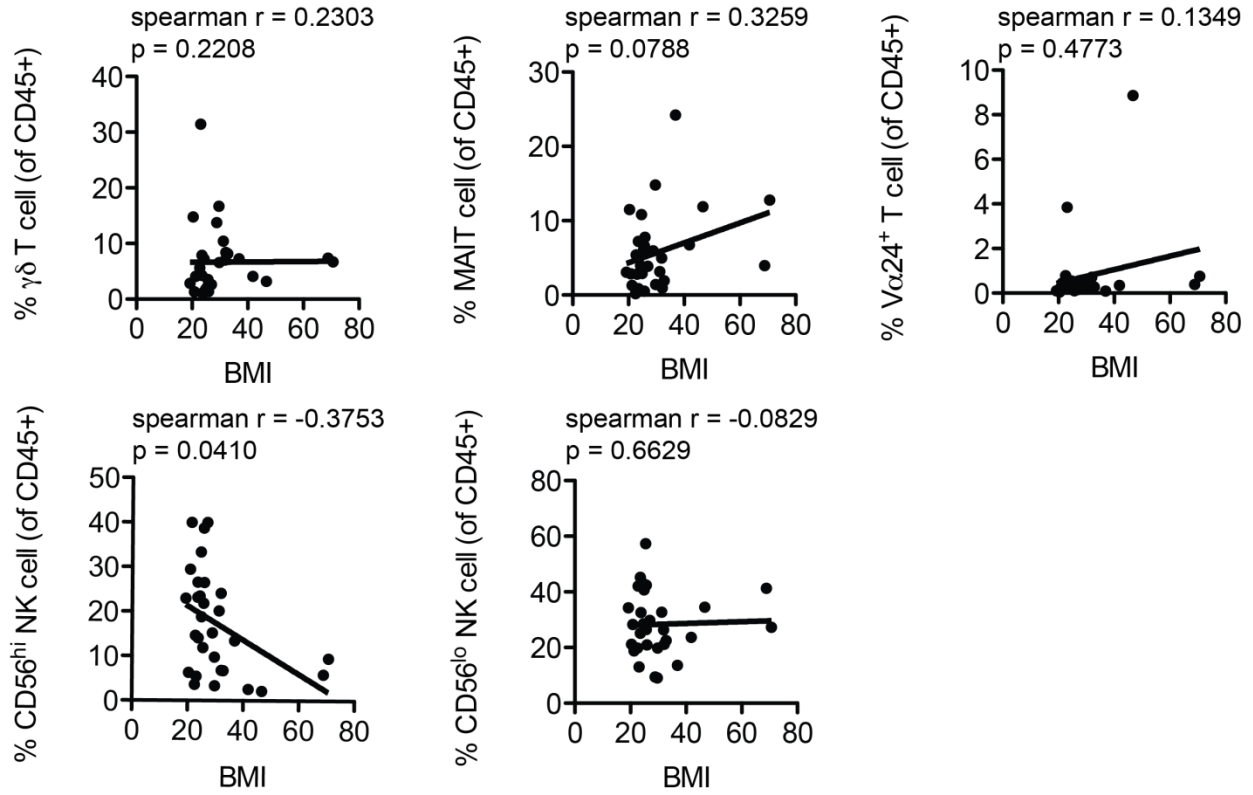**B**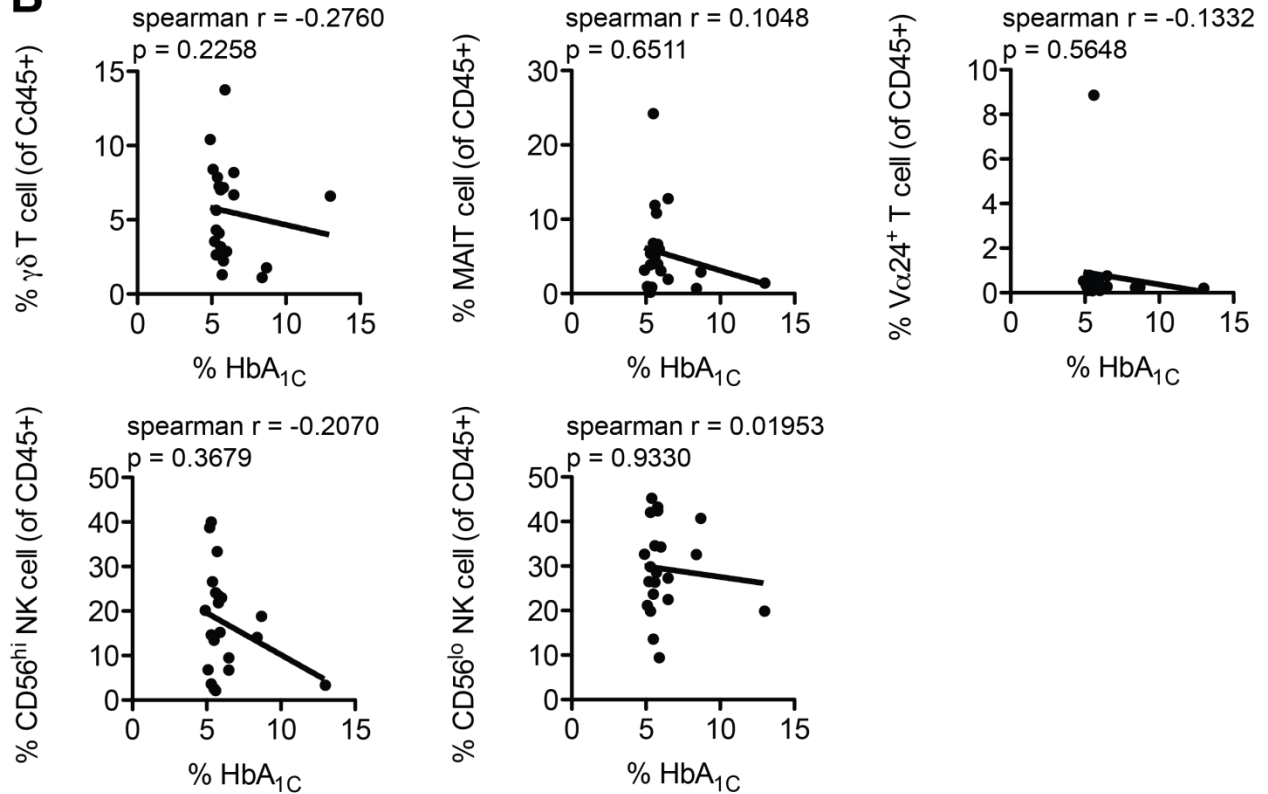



**Supplemental Figure 5. Correlative analyses of human intrahepatic mononuclear cell subsets to BMI or % HbA1c.** Correlations between the percentage of various intrahepatic mononuclear cell subsets of total CD45+ gated cells by flow cytometry to **(A)** BMI and **(B)** % HbA1c. Spearman r values and p values are indicated in figure graphs.

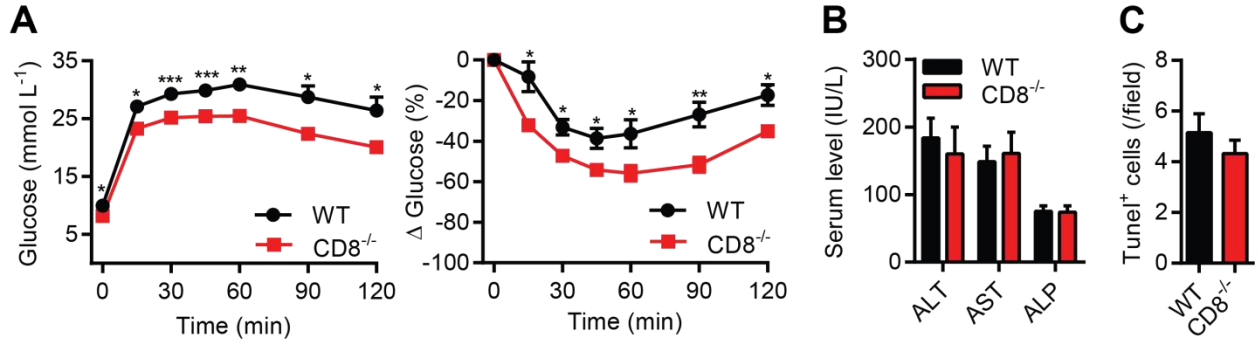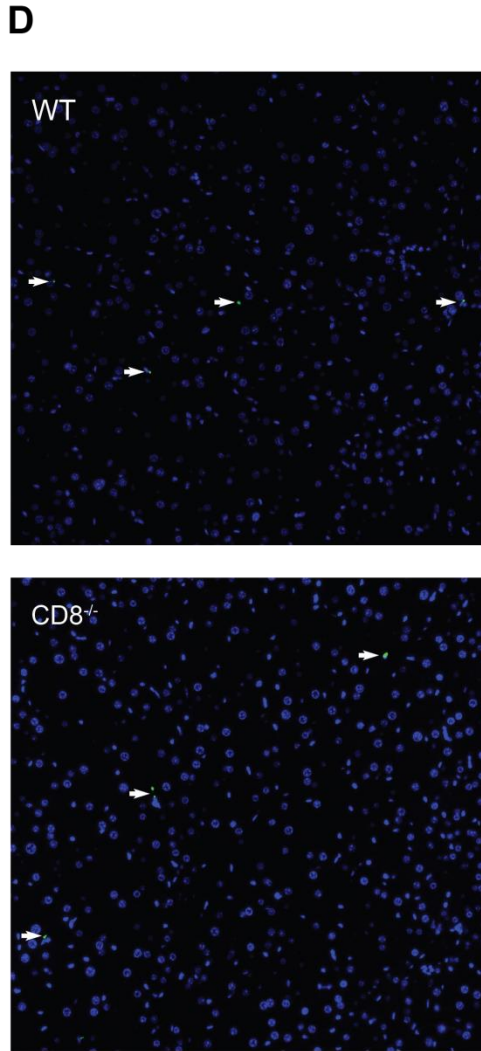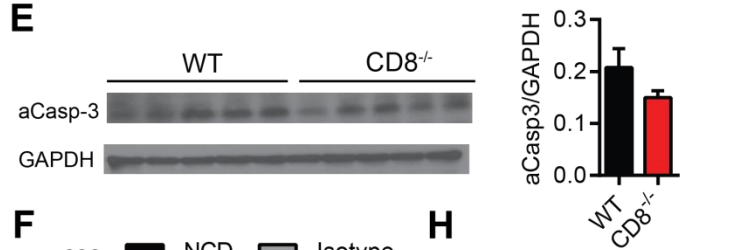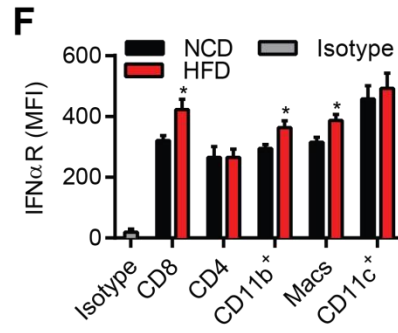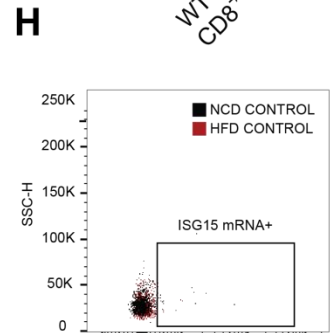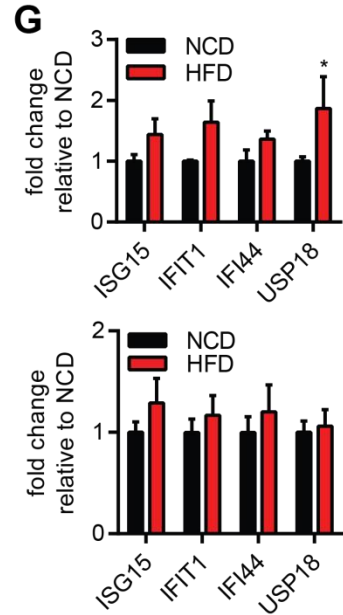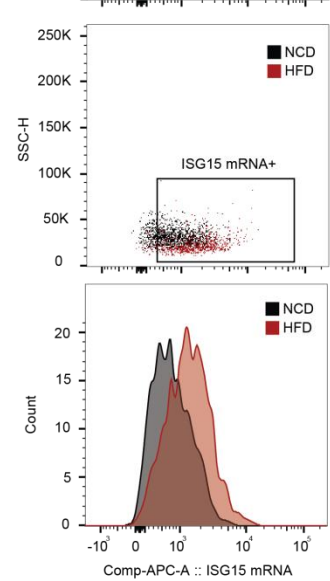

**Supplemental Figure 6. Metabolic and liver function parameters of HFD-fed CD8<sup>-/-</sup> mice and expression of IFN-responsive genes in immune cells.** Metabolic and liver function testing of WT and CD8<sup>-/-</sup> mice fed a HFD for 16 weeks including a **(A)** GTT (Left, n=5), ITT (Right, n=5), and **(B)** serum levels of alanine transaminase (ALT), aspartate transaminase (AST), and alkaline phosphatase (ALP, n=5). TUNEL assay of liver sections from HFD-fed WT and CD8<sup>-/-</sup> mice (n=7) showing the **(C)** average number of TUNEL positive cells (4 fields, 100X magnification) and **(D)** representative images. **(E)** Representative western blot and analysis of liver lysates immunoblotted for active caspase-3 (aCasp-3) and GAPDH proteins in HFD-fed WT and CD8<sup>-/-</sup> mice (n=5). Flow cytometry analysis of liver immune cells isolated from 16 wk HFD- or NCD-fed WT mice representing the **(F)** mean fluorescent intensity (MFI) expression of IFN $\alpha$ R1 in CD8<sup>+</sup> and CD4<sup>+</sup> T cells, CD11b<sup>+</sup> monocytes, F4/80<sup>+</sup> macrophages, and CD11c<sup>+</sup> cells (n=4-8). **(G)** Gene expression analysis of ISGs in CD11b<sup>+</sup> monocytes (top, n=8) and CD4<sup>+</sup> T cells (bottom, n=5) from the livers of 16 wk HFD- or NCD-fed WT mice. **(H)** Representative flow cytometry dot plots (Top, negative control; Middle) and histogram (Bottom) showing the expression of ISG15, in CD8<sup>+</sup> T cells from NCD (black)- and HFD (red)-fed mice using RNA fluorescent in situ hybridization (FISH) followed by branched amplification and flow cytometry analysis (PrimeFlow®). Statistical significance is denoted by \* (p<0.05), and \*\* (p<0.01).

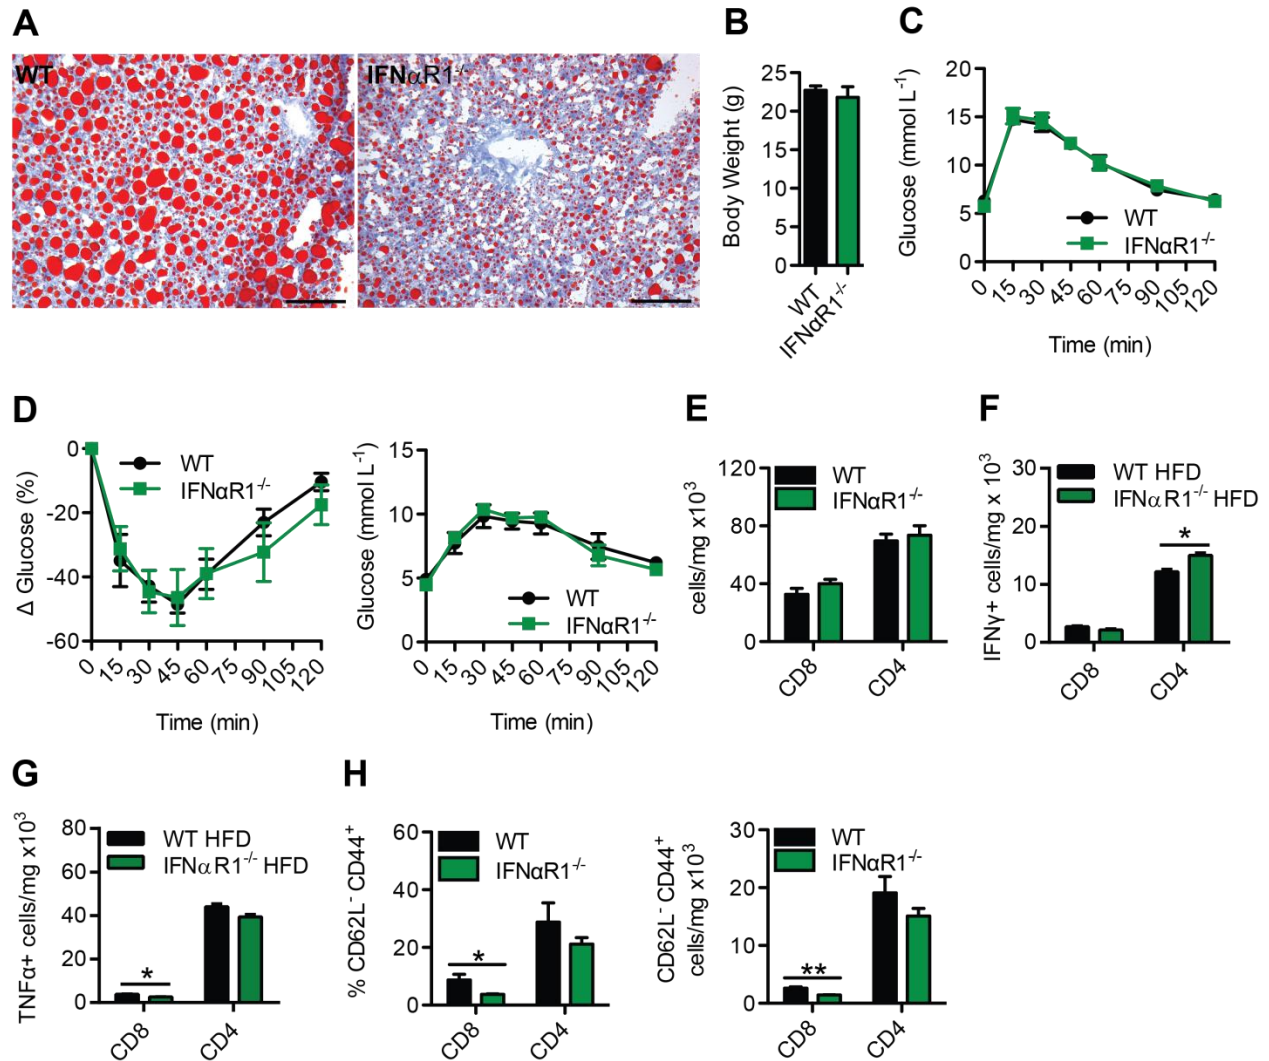

**Supplemental Figure 7. Additional metabolic assessment and T cell subset analysis of IFN $\alpha$ R1<sup>-/-</sup> mice. (A)** Lipid staining by oil red O of liver sections from WT and IFN $\alpha$ R1<sup>-/-</sup> (n=3) mice fed a HFD for 16 weeks (200X magnification, Scale bar: 100 $\mu$ m). Metabolic testing of IFN $\alpha$ R1<sup>-/-</sup> mice fed a NCD including **(B)** body weight, **(C)** GTT (n=5), and **(D)** ITT (Left, n=5) and PTT (Right, n=5). Flow cytometry analysis of splenocytes isolated from 16 wk HFD-fed WT and IFN $\alpha$ R1<sup>-/-</sup> mice representing **(E)** splenic CD8+ and CD4+ T cells (n=4), intracellular T cell stains for **(F)** IFN $\gamma$  and **(G)** TNF $\alpha$  (n=2), and **(H)** effector memory T cell subsets (n=4), and using previously stated gating strategies. Statistical significance is denoted by \* (p<0.05), and \*\* (p<0.01).

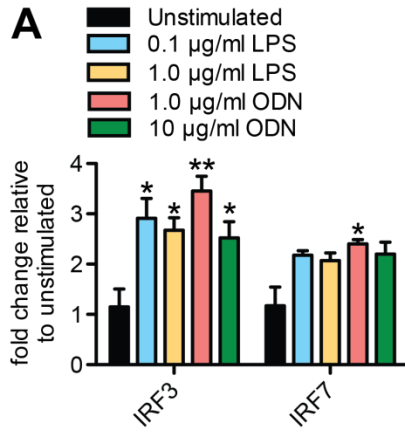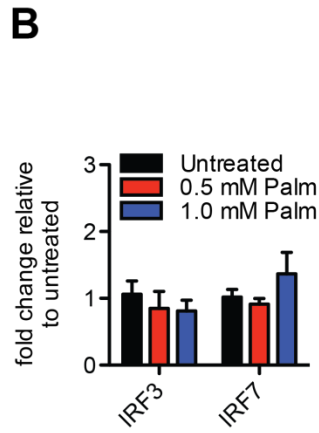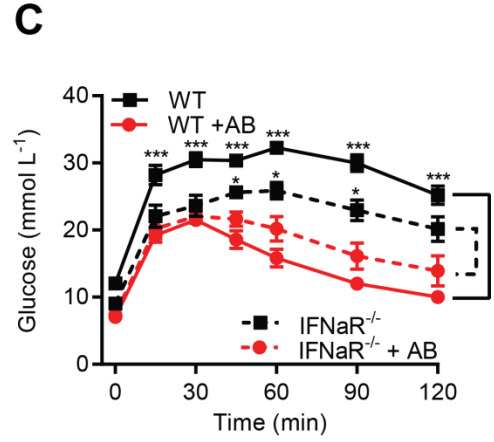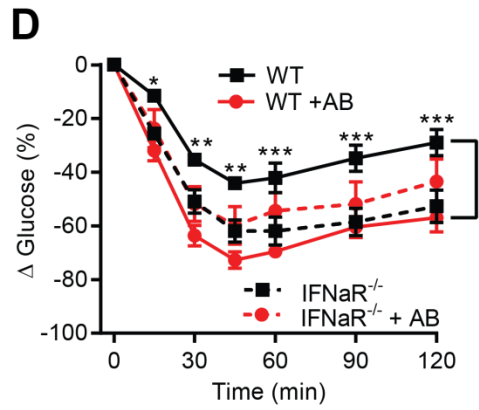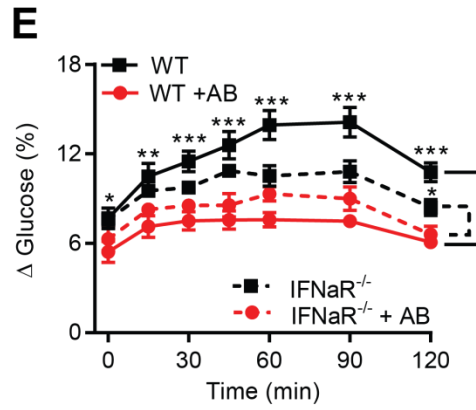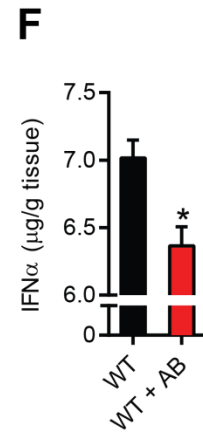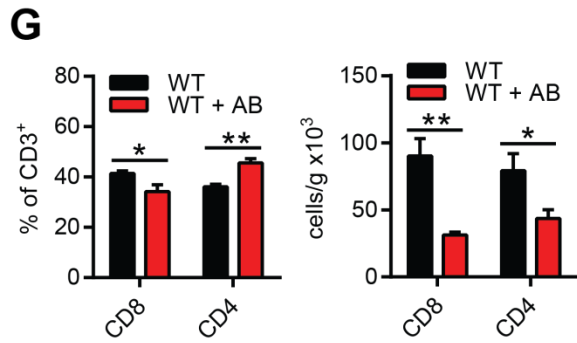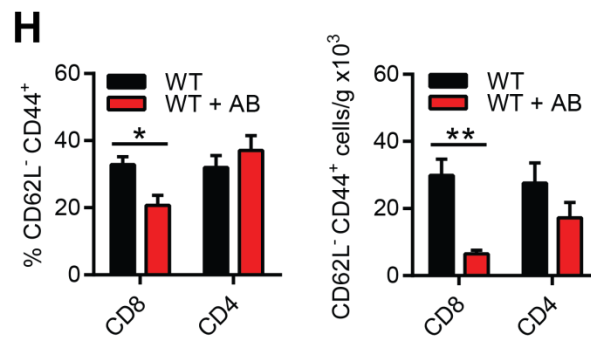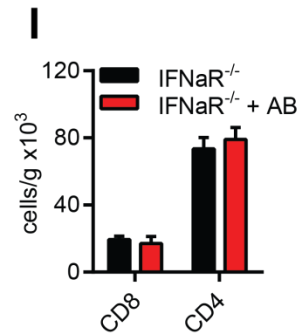

**Supplemental Figure 8. Bacterial products drive hepatic type I interferon production and T cell inflammation.** RT-PCR gene expression analysis of IRF3 and IRF7 from primary hepatocyte cell lysates that were treated with **(A)** 0.1 or 1.0  $\mu\text{g/ml}$  LPS and 1.0 or 10  $\mu\text{g/ml}$  unmethylated CpG (ODN2395) (n=3), and **(B)** 0.5 or 1.0 mM sodium palmitate for 12 hrs at 37°C (n=3-6). Metabolic testing of HFD-fed WT and IFN $\alpha$ R1<sup>-/-</sup> mice including a **(C)** GTT (n=5), **(D)** ITT (n=5), and **(E)** PTT (n=5) after 4 weeks of treatment with either antibiotics (AB) or control water. **(F)** Quantification of IFN $\alpha$  protein, **(G)** flow cytometry analysis of total CD8+ and CD4+ T cells, **(H)** CD8+ and CD4+ T effector memory cells of antibiotic-treated HFD-fed WT mice (n=5). **(I)** Flow cytometry analysis of total CD8+ and CD4+ T cells in antibiotic-treated HFD-fed IFN $\alpha$ R1<sup>-/-</sup> mice (n=5). Statistical significance is denoted by \* (p<0.05), \*\* (p<0.01), and \*\*\* (p<0.001).

**Supplemental Table 1.** Fluorophore-conjugated antibodies used for flow cytometry

| <b>Antibody</b>                           | <b>Clone, Supplier</b>  |
|-------------------------------------------|-------------------------|
| AlexaFluor 700 anti-mouse CD45.2          | 104, BioLegend          |
| FITC anti-mouse CD45.1                    | A20, BioLegend          |
| AlexaFluor 647 anti-mouse CD3 $\epsilon$  | 145-2C11, BioLegend     |
| PE-Cy7 anti-mouse CD4                     | RM4-5, BioLegend        |
| PE-Cy5 anti-mouse CD8a                    | 53-6.7, BioLegend       |
| APC-Cy7 anti-mouse NK1.1                  | PK136, BioLegend        |
| PerCP-Cy5.5 anti-mouse $\gamma\delta$ TCR | GL3, BioLegend          |
| FITC anti-mouse CD62L                     | MEL-14, BioLegend       |
| PerCP anti-mouse CD44                     | IM7, BioLegend          |
| BV421 anti-mouse IFN- $\gamma$            | XMG1.2, BioLegend       |
| PE-Cy7 anti-mouse TNF- $\alpha$           | MP6-XT22, BioLegend     |
| PE anti-mouse Ki-67                       | 16A8, BioLegend         |
| PE anti-mouse IFNAR1                      | MAR1-5A3, BioLegend     |
| AlexaFluor 488 anti-mouse FOXP3           | 150D, BioLegend         |
| FITC anti-mouse CD4                       | GK1.5, BioLegend        |
| PE anti-mouse IL-17A                      | TC11-18H10.1, BioLegend |

**Supplemental Table 2.** Primer sets used for real-time-PCR

| <b>Gene</b>   | <b>Primer Sequences</b>                                            |
|---------------|--------------------------------------------------------------------|
| <i>G6Pc</i>   | F: 5'-CGACTCGCTATCTCCAAGTGA-3'<br>R: 5'-GTTGAACCAGTCTCCGACCA-3'    |
| <i>PEPCK1</i> | F: 5'-CTGCATAACGGTCTGGACTTC-3'<br>R: 5'-CAGCAACTGCCCGTACTCC-3'     |
| <i>IRF3</i>   | F: 5'-GAGAGCCGAACGAGGTTTCAG-3'<br>R: 5'-CTTCCAGTTGACACGTCCG-3'     |
| <i>IRF7</i>   | F: 5'-GAGACTGGCTATTGGGGGAG-3'<br>R: 5'-GACCGAAATGCTTCCAGGG-3'      |
| <i>ISG15</i>  | F: 5'-GGTGTCCGTGACTAACTCCAT-3'<br>R: 5'-TGGAAAGGGTAAGACCGTCCT -3'  |
| <i>IFIT1</i>  | F: 5'-CTGAGATGTCACTTCACATGGAA-3'<br>R: 5'-GTGCATCCCCAATGGGTTCT-3'  |
| <i>IFIT2</i>  | F: 5'-AGTACAACGAGTAAGGAGTCACT-3'<br>R: 5'-AGGCCAGTATGTTGCACATGG-3' |
| <i>IFI44</i>  | F: 5'-AACTGACTGCTCGCAATAATGT-3'<br>R: 5'-GTAACACAGCAATGCCTCTTGT-3' |
| <i>USP18</i>  | F: 5'-TTGGGCTCCTGAGGAAACC-3'<br>R: 5'-CGATGTTGTGTAACCAACCAGA-3'    |
| <i>GAPDH</i>  | F: 5'-TCACCACCATGGAGAAGGC-3'<br>R: 5'-GCTAAGCAGTTGGTGGTGCA-3'      |

## **Supplemental Experimental Procedures**

**Mice.** Knockout or transgenic Mice had been backcrossed at least 10 generations on C57BL/6J background and maintained in a pathogen-free, temperature-controlled environment on a 12 hr light and dark cycle at the Toronto Medical Discovery Tower facility.

**Metabolic Studies.** After 16 weeks on diet, fasting blood glucose and insulin levels were measured (Crystal Chem Inc ELISA). For glucose and pyruvate tolerance tests, mice were fasted for 16 hours and then injected intraperitoneally (i.p.) with 1.5 g/kg (of body weight) D-glucose or sodium pyruvate (Sigma) in PBS. For insulin tolerance tests, mice were fasted for 6 hours and then injected i.p. with 0.75 U/kg (of body weight) insulin (Eli Lilly) in PBS. Blood glucose concentrations were determined at indicated time points using a Contour Next EZ (Bayer) glucometer and Contour Next strips (Bayer). Serum alanine transaminase (ALT), aspartate transaminase (AST), and alkaline phosphatase (ALP) were measured by the Centre for Phenogenomics (Mount Sinai Hospital).

**Processing of immune cells from tissues.** Perfused livers were disrupted using a gentleMACS tissue dissociator and resuspended in RPMI-1640 media containing 10% FBS. This suspension was centrifuged at 60 g for 1 min and the supernatant containing hepatic immune cells was collected and centrifuged again at 480 g for 8 min. The pellet was resuspended in 10 mL of 37.5% Percoll (Sigma) in PBS and centrifuged at 850 g for 30 min. The resulting pellet was washed followed by red blood cell lysis in ammonium-chloride-potassium (ACK) lysis buffer for 2 min at room temperature. VAT cells were isolated from epididymal VAT pads that were mashed and digested in collagenase (0.2 mg/ml) DMEM at 37°C for 45 min. Cells were then washed, pelleted



and filtered through a 70- $\mu$ m nylon cell strainer, followed by red blood cell lysis and washed to obtain stromal vascular cells (SVC) containing immune cells. Splenocytes were isolated by mechanically dissociating spleen tissue on 70- $\mu$ m nylon cell strainers, followed by red blood cell lysis and washing.

**Flow Cytometry.** TCRV $\beta$  studies were performed using the Mouse TCRV $\beta$  Screening Panel (BD Pharmingen). For intracellular staining of T cells, cells were incubated with Cell Stimulating Cocktail and Golgistop (eBioscience) for 5 hours at 37°C in lymphocyte culture media as described. Cells were then treated with fixation/permeabilization buffer (eBioscience) for 1 hour at 4°C and stained. For detection of NKT cells, we stained intrahepatic cells with CD1d tetramers loaded with the marine sponge glycosphingolipid  $\alpha$ -galactosylceramide ( $\alpha$ GalCer, NIH Tetramer Core Facility) for 30 min at 4°C followed by cell surface staining. Expression of ISG15 mRNA was analyzed in CD8<sup>+</sup> surface-stained cells by flow cytometry using the PrimeFlow Assay kit (Affymetrix eBioscience) according to the manufacturer's protocols. All data were acquired on a Fortessa flow cytometer (BD Bioscience) and analyzed using FlowJo software (Tree Star).

**Mixed Bone Marrow Chimeras.** Six week old WT CD45.1 mice were irradiated with 1100 cGy divided in two cycles of 550 cGy on the same day using a Cesium-137 irradiator, and reconstituted with intravenous (i.v.) injections of  $5 \times 10^6$  BM mixtures (in 100 $\mu$ l PBS) of either (1) 85% CD8<sup>-/-</sup> and 15% IFN $\alpha$ R1<sup>-/-</sup> BM cells, or (2) 85% CD8<sup>-/-</sup> and 15% WT BM cells from 6 week old CD8<sup>-/-</sup>, IFN $\alpha$ R1<sup>-/-</sup>, or WT CD45.2 mice. BM cells were obtained by flushing mouse femurs and tibias with PBS using a 26-gauge needle, dissociated into single-cell suspension, hemolyzed, washed in PBS and counted. BM chimeric mice were treated with Baytril drinking water for 2 weeks after BM transfer,

then fed a HFD for 16 weeks. Chimerism (>95%) and IFN $\alpha$ R1 expression was evaluated by flow cytometry.

**Treatment of Primary Hepatocytes.** Livers were perfused with digestion media containing collagenase (1 mg/ml) in DMEM then PBS. Livers were mechanically dissociated and single cell suspensions were centrifuged three times for 2 min at 60 g to eliminate small cells residing in supernatants. From the final pellet containing hepatocytes,  $1 \times 10^6$  cells were seeded onto 6 well plates and left over night in culture medium.

**Western Blotting.** Mice were fasted overnight and injected i.p. with 1.5 U/kg of insulin in PBS. Livers were harvested 15 min after acute insulin injection and snap frozen in liquid nitrogen. Tissue was mechanically homogenized in ice-cold lysis buffer (Santa Cruz) and protein concentration was determined using the Pierce BCA Protein Assay (Thermo Scientific). Protein lysates were separated by SDS-PAGE and immunoblotted with antibodies (Cell Signaling Technology) against Akt (Cell Signaling Technology) and Ser473-phosphorylated Akt (Signal Way Antibody), GAPDH or  $\beta$ -actin (Santa Cruz Biotechnology). The results are shown as fold changes relative to the pAkt/Akt ratio of the control group.

**Histology and Human Liver Biopsies.** Mouse liver tissue was fixed for 48 hrs in 10% buffered formalin before sectioning onto slides for hematoxylin-eosin staining and TUNEL (Roche). For Oil-red-O staining, mouse liver tissues were snap frozen before staining with Oil-red-O to visualize neutral lipids. The patient cohort consisted of 13 males and 6 females with an average age of 44.26. When selecting the patient cohort, cirrhosis was an exclusion criterion. Each human sample was given a NAFLD Activity Score (NAS), quantified for CD8+ cells per high power field (HPF =  $0.237 \text{ mm}^2$ ) and

given an Expression Score for the degree of IRF3 or ISG15 staining. Expression scores for IRF3 and ISG15 were based on the intensity of staining (scored with range of 0-3, with 3 being most intense) and percentage of cells staining (0, 1 being 0-30%, 2 being 30-60%, 3 being 60-100%). The intensity and percentage scores were added to form the expression score out of 6 for both hepatocytes and mononuclear cells, and these scores were added to form a total expression score out of 12, which is plotted.

**Isolation of Human Intrahepatic Mononuclear Cells.** Peripheral blood was removed by aortic flush and the liver-associated mononuclear cells were collected by liver-specific perfusion with either HTK or University of Wisconsin solution. Mononuclear cells were isolated by density gradient centrifugation.
